# Supplementary material for: A simple, rapid, one-step approach for preparation of Ag@TiO2 nanospheres with multiple cores as effective catalyst
Source: Royal Society of Chemistry journal article supplement (doi:10.1039/c6ra21173a), 2016-01-01
Supplement: c6ra21173a1.pdf [file c6ra21173a1.pdf]

## Supporting Information

### **A simple, rapid, one-step approach for preparation of Ag@TiO<sub>2</sub> nanospheres with multiple cores as effective catalyst**

Donghai Wang,<sup>a</sup> Zheng Jiao,<sup>b</sup> Minghong Wu,<sup>b</sup> Lanbing Gu,<sup>a</sup> Zhiwen Chen,<sup>\*b</sup> and  
Haijiao Zhang<sup>\*a</sup>

*<sup>a</sup>Institute of Nanochemistry and Nanobiology, Shanghai University, Shanghai 200444,  
P. R. China*

*<sup>b</sup>School of Environmental and Chemical Engineering, Shanghai University, Shanghai  
200444, P. R. China*

\*Corresponding author:

E-mail: [hjzhang128@shu.edu.cn](mailto:hjzhang128@shu.edu.cn); [zwchen@shu.edu.cn](mailto:zwchen@shu.edu.cn)

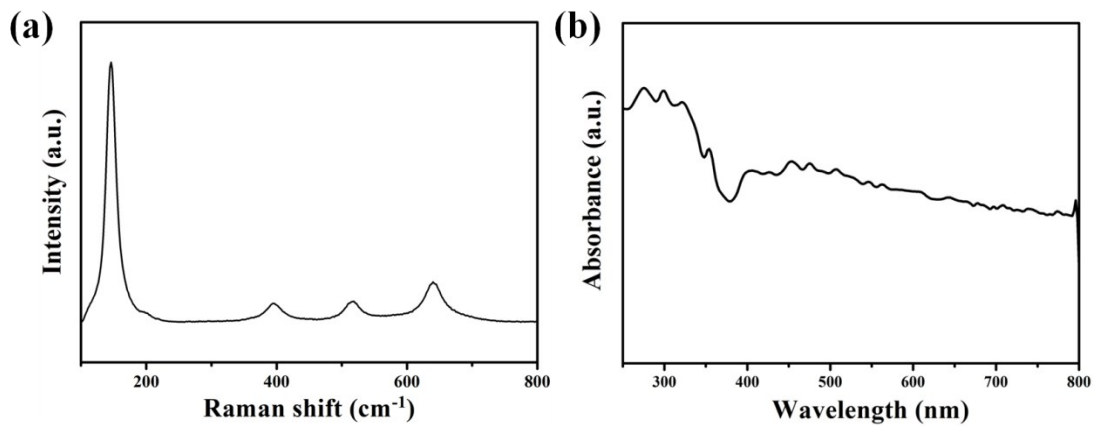

**Fig. S1** (a) Raman spectrum and (b) UV-Vis spectrum of Ag@TiO<sub>2</sub> nanospheres.

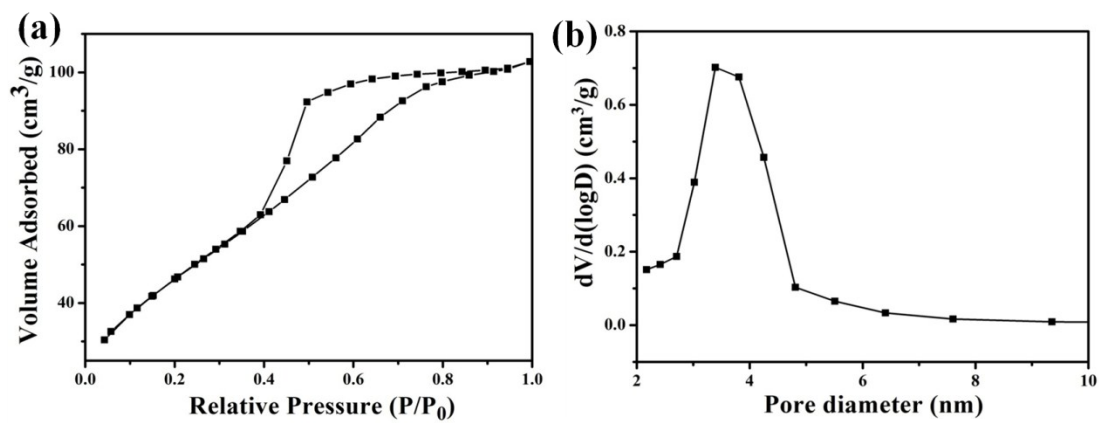

**Fig. S2** N<sub>2</sub> adsorption-desorption isotherm and corresponding pore size distribution of Ag@TiO<sub>2</sub> nanospheres.

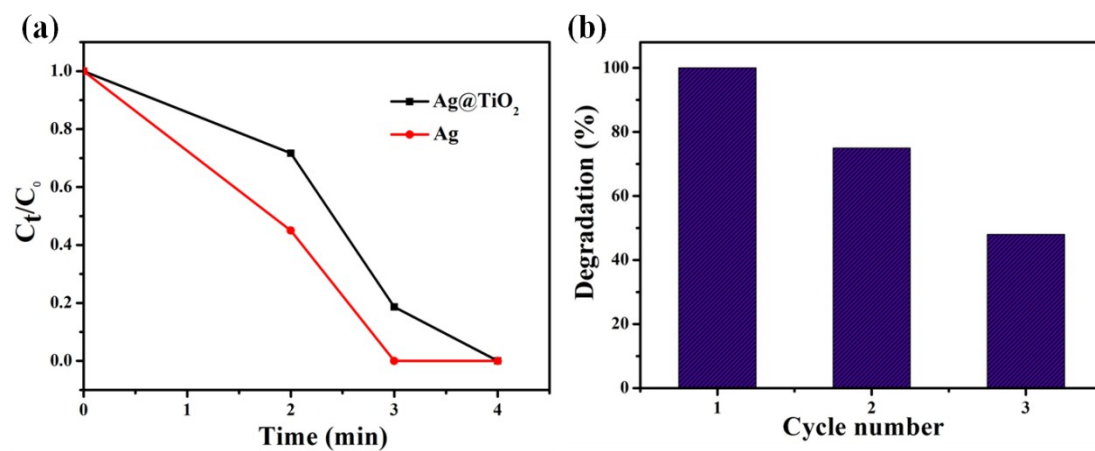

**Fig. S3** (a) UV-Vis spectra for the reduction of 4-NP with pure Ag nanoparticles and Ag@TiO<sub>2</sub> as catalyst, respectively, (b) cycling stability of Ag nanoparticles after 3 cycles.
